# Supplementary material
Source: PubMed Central journal article supplement (PMC10050032)
Supplement: 392_2022_2102_MOESM1_ESM.pdf [file 392_2022_2102_MOESM1_ESM.pdf]

**Supplemental Table 1: Poisson regression models to predict the number of STEMI in 2020**

**Regression 2017-2019**

|       | <b>Coeff</b> | <b>p-value</b> | <b>95%CI</b> |       |
|-------|--------------|----------------|--------------|-------|
| year  | 0.01         | 0.343          | -0.01        | 0.04  |
| month |              |                |              |       |
| 2     | -0.13        | 0.000          | -0.16        | -0.10 |
| 3     | -0.02        | 0.433          | -0.06        | 0.03  |
| 4     | -0.07        | 0.000          | -0.10        | -0.04 |
| 5     | -0.02        | 0.071          | -0.05        | 0.00  |
| 6     | -0.14        | 0.000          | -0.16        | -0.11 |
| 7     | -0.10        | 0.000          | -0.12        | -0.07 |
| 8     | -0.12        | 0.000          | -0.18        | -0.07 |
| 9     | -0.11        | 0.000          | -0.15        | -0.08 |
| 10    | -0.06        | 0.000          | -0.09        | -0.03 |
| 11    | -0.04        | 0.000          | -0.07        | -0.02 |
| 12    | -0.11        | 0.066          | -0.23        | 0.01  |
| _cons | -17.15       | 0.528          | -70.44       | 36.14 |

**prediction for 2020**

| month | <b>Coeff</b> | <b>p-value</b> | <b>95%CI</b> |          |
|-------|--------------|----------------|--------------|----------|
| 1     | 5735.98      | 0.000          | 5399.00      | 6072.97  |
| 2     | 5033.83      | 0.000          | 4748.33      | 5319.33  |
| 3     | 5637.05      | 0.000          | 5259.49      | 6014.62  |
| 4     | 5354.85      | 0.000          | 5061.66      | 5648.04  |
| 5     | 5610.44      | 0.000          | 5314.31      | 5906.57  |
| 6     | 5003.01      | 0.000          | 4736.91      | 5269.12  |
| 7     | 5210.82      | 0.000          | 4935.87      | 5485.77  |
| 8     | 5065.98      | 0.000          | 4728.79      | 5403.17  |
| 9     | 5113.20      | 0.000          | 4806.82      | 5419.59  |
| 10    | 5394.40      | 0.000          | 5100.25      | 5688.55  |
| 11    | 5483.77      | 0.000          | 5192.70      | 5774.83  |
| 12    | 5125.344     | 0.000          | 4719.178     | 5531.509 |
